# Supplementary material
Source: PubMed Central journal article supplement (PMC7114872)
Supplement: mmc1.pdf [file mmc1.pdf]

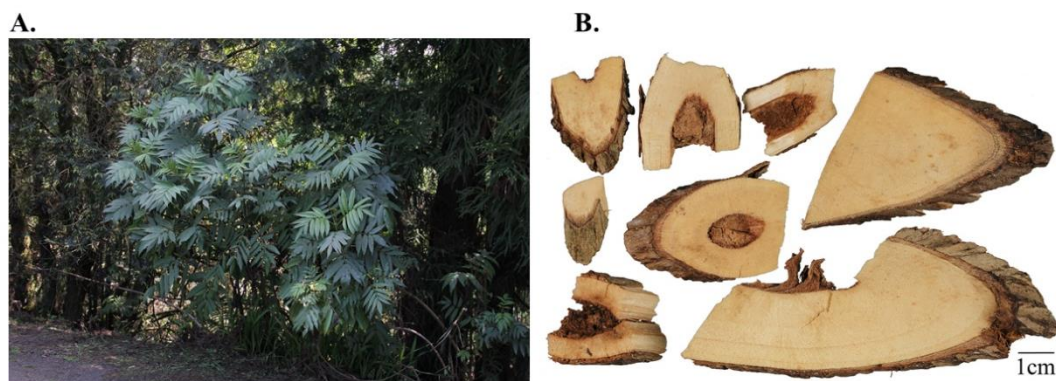

**Supplemental Fig. 1.** The plant (A) and dried stem slices (B) of *Sambucus Formosana* Nakai.

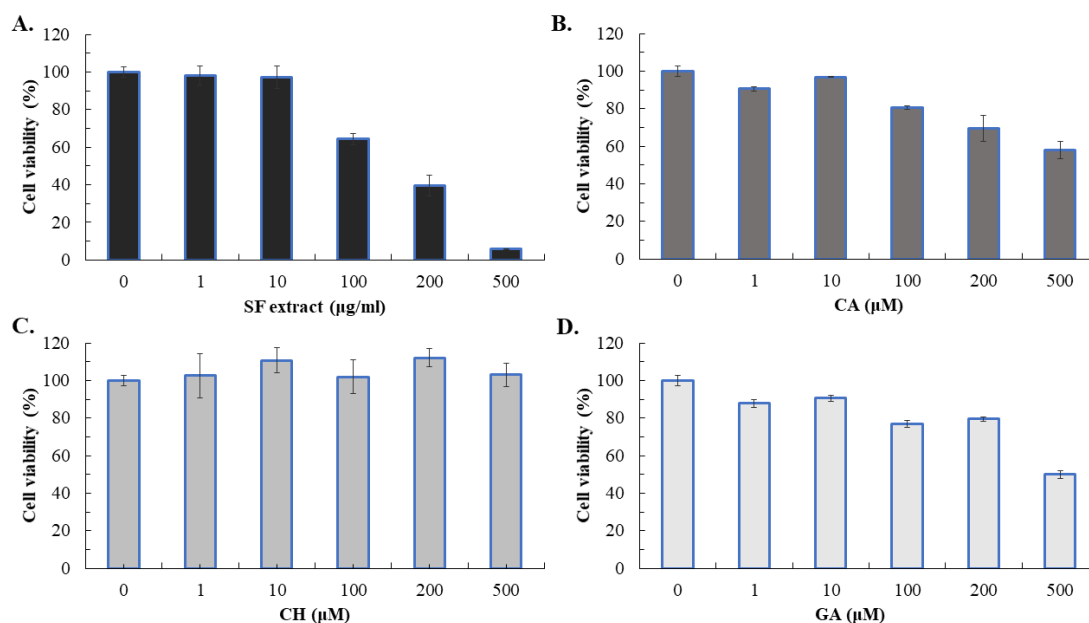

**Supplemental Fig. 2.** Cell viability of LLC-MK2 cells treated with *Sambucus Formosana* stem extract (A), CA (caffeic acid, B), CH (chlorogenic acid, C) and GA (gallic acid, D). Cytotoxicity of indicated agents to LLC-MK2 cells was performed using MTT assay. Cell viability of treated cells were calculated as the ratio of OD<sub>570-630 nm</sub> of treated cells to OD<sub>570-630 nm</sub> of mock cells.
